CORRECTION

# Correction: Long-Term Benefits of Smoking Cessation on Gastroesophageal Reflux Disease and Health-Related Quality of Life

Yukie Kohata, Yasuhiro Fujiwara, Takanori Watanabe, Masanori Kobayashi, Yasuhiko Takemoto, Noriko Kamata, Hirokazu Yamagami, Tetsuya Tanigawa, Masatsugu Shiba, Toshio Watanabe, Kazunari Tominaga, Taichi Shuto, Tetsuo Arakawa

There is an error in the Results subsection of the Abstract as well as third paragraph of the Results section. In both of these instances, 43.9% should be 43.1%.

There is an error in the caption of [Fig 3](#). The authors have provided a corrected caption for [Fig 3](#) here.

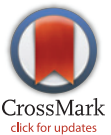

 OPEN ACCESS

**Citation:** Kohata Y, Fujiwara Y, Watanabe T, Kobayashi M, Takemoto Y, Kamata N, et al. (2016) Correction: Long-Term Benefits of Smoking Cessation on Gastroesophageal Reflux Disease and Health-Related Quality of Life. PLoS ONE 11(3): e0150554. doi:10.1371/journal.pone.0150554

**Published:** March 1, 2016

**Copyright:** © 2016 Kohata et al. This is an open access article distributed under the terms of the [Creative Commons Attribution License](#), which permits unrestricted use, distribution, and reproduction in any medium, provided the original author and source are credited.

Success group

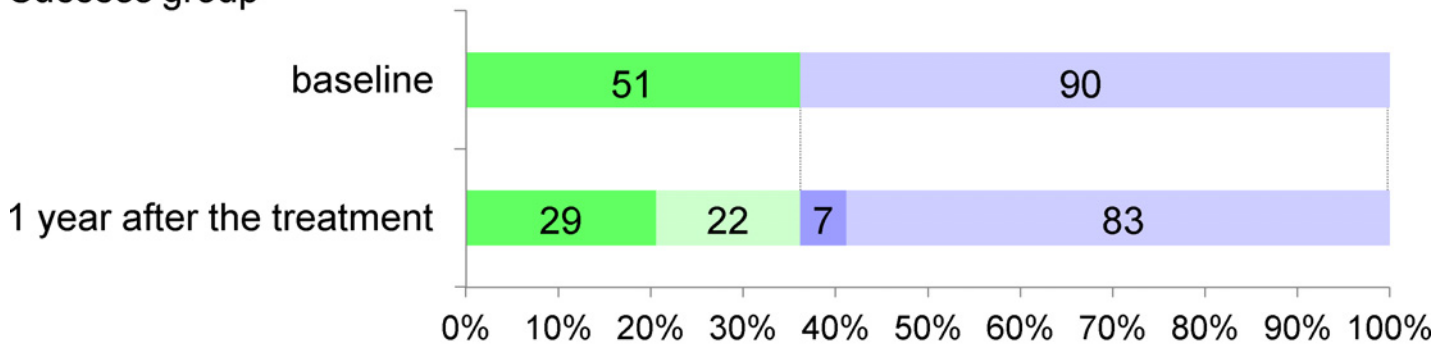

Failure group

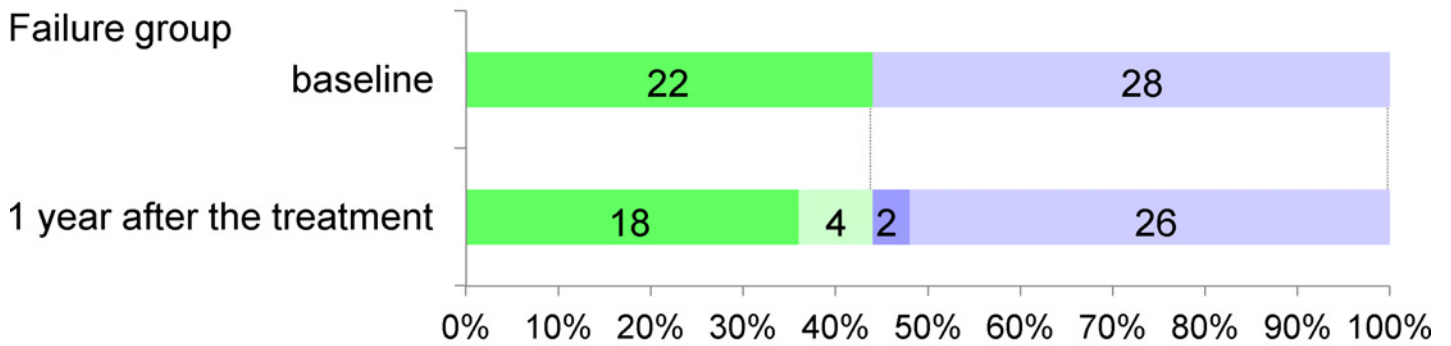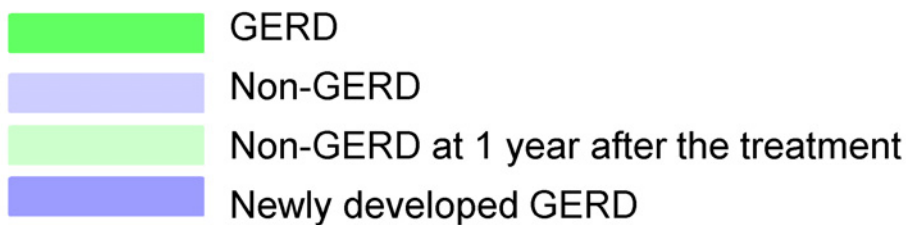

**Fig 3. Prevalence of GERD at baseline and 1 year after attempted smoking cessation.** The number of patients that experienced improvement in GERD was significantly higher in the success group (43.1%) than in the failure group (18.2%). Seven (7.8%) of the patients within the success group and 2 (7.1%) of the 28 patients within the failure group newly developed GERD at 1 year after the treatment.

doi:10.1371/journal.pone.0150554.g001

Reference

1. Kohata Y, Fujiwara Y, Watanabe T, Kobayashi M, Takemoto Y, Kamata N, et al. (2016) Long-Term Benefits of Smoking Cessation on Gastroesophageal Reflux Disease and Health-Related Quality of Life. PLoS ONE 11(2): e0147860. doi:10.1371/journal.pone.0147860 PMID: 26845761
